# Supplementary material
Source: Atypon-hosted journal article supplement (doi:10.1287/opre.2024.0733)

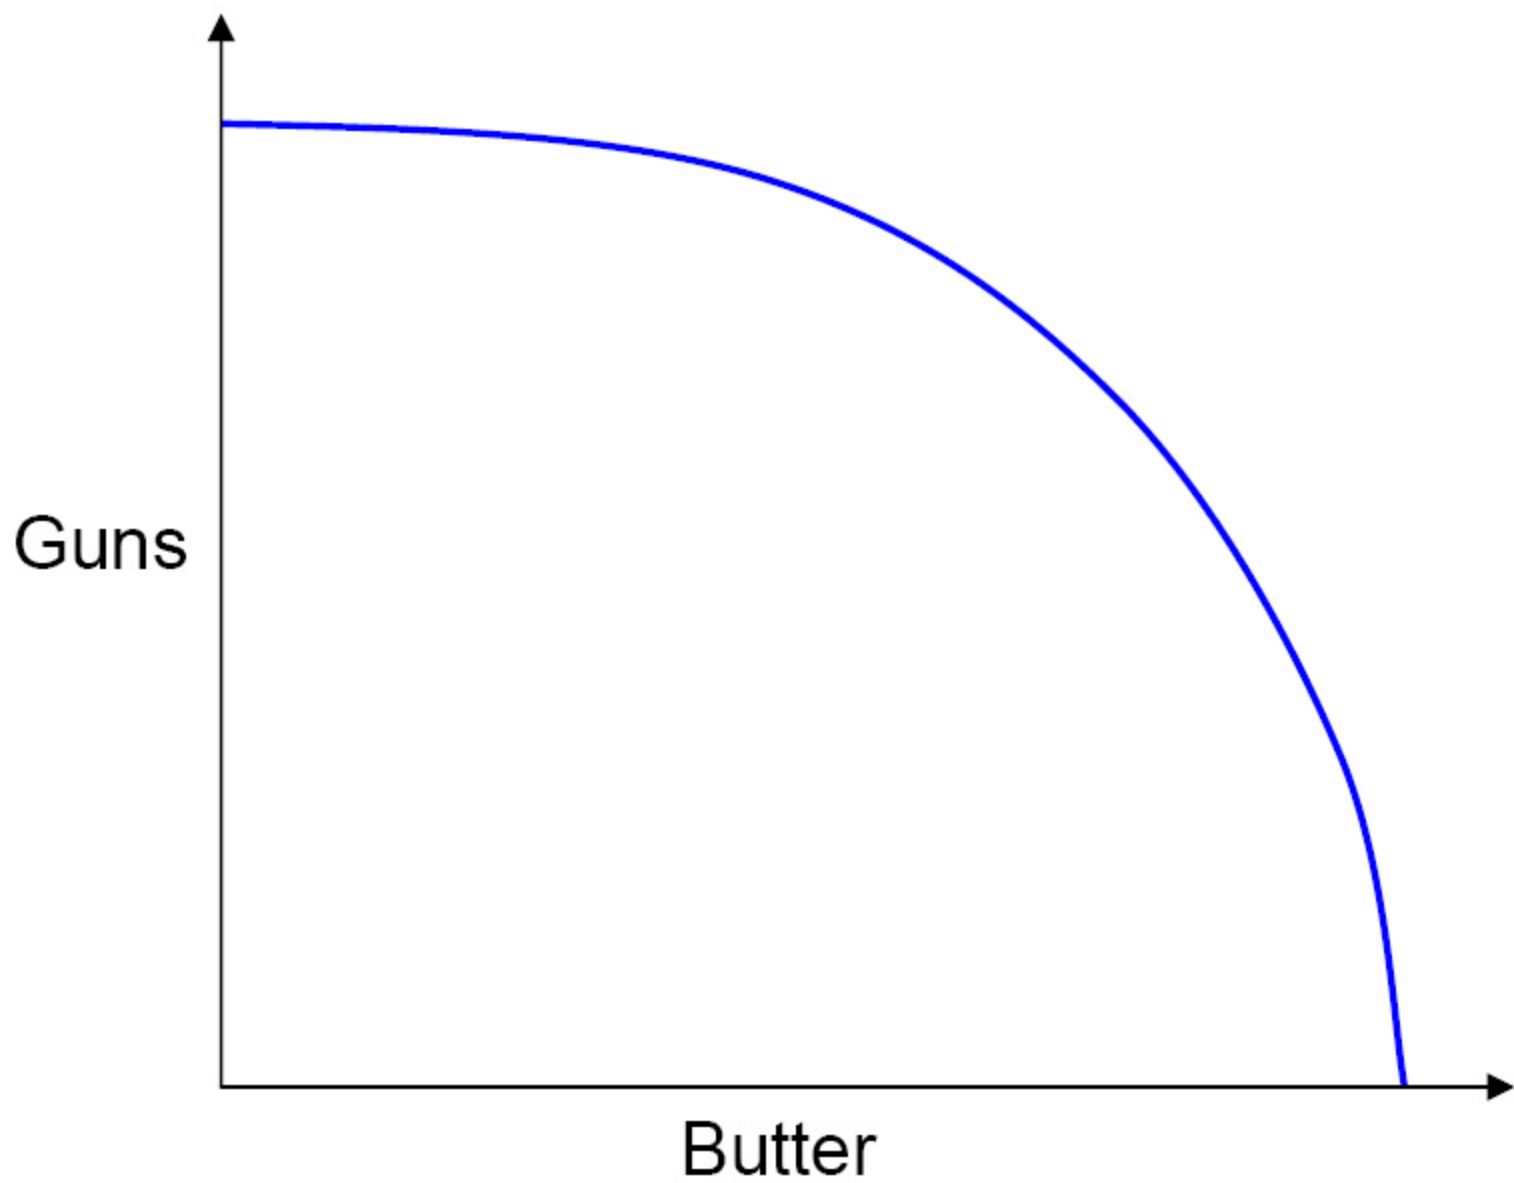

Supplement: opre.2024.0733.cd.zip [file Sample-Figure.pdf › cls_files/Sample-Figure.pdf]

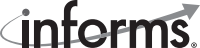

Supplement: opre.2024.0733.cd.zip [file informs_Logo.pdf › cls_files/informs_Logo.pdf]
